# Supplementary material for: Predicting the risk of mortality during hospitalization in sick severely malnourished children using daily evaluation of key clinical warning signs
Source: Springer Nature journal article supplement (doi:10.1186/s12916-021-02074-6), 2021-09-20
Supplement: MOESM2 [file 19679342]

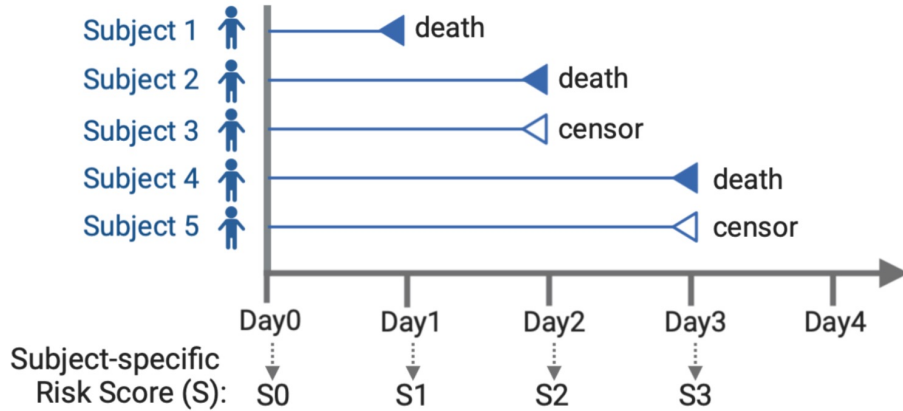

**(a) Concordance of Time-static Prediction**

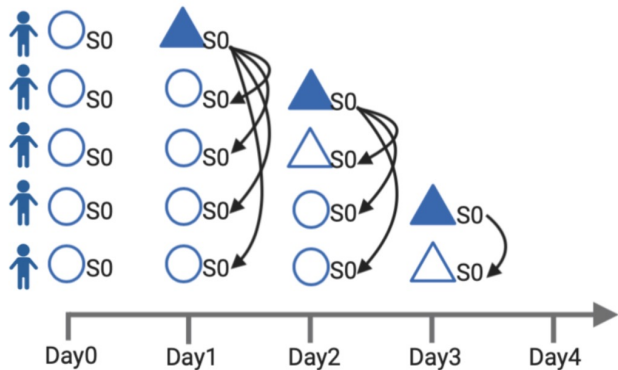

**(b) Concordance of Time-updated Prediction**

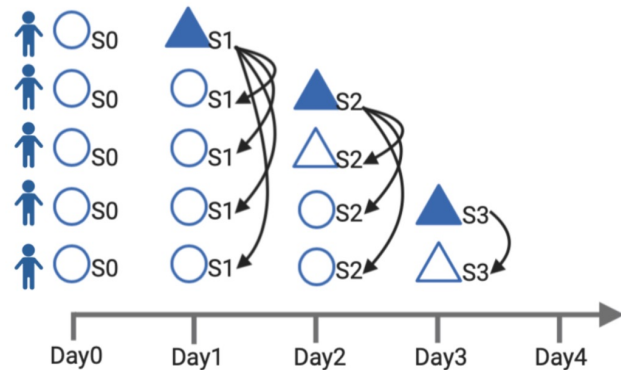

A valid pair of concordant comparison:

Concordant pair: Risk score of subject died > Risk score of subject alive

Discordant pair: Risk score of subject died ≤ Risk score of subject alive

Concordance index = Total Concordant pairs / Total Discordant pairs
