# Supplementary material for: Predicting the risk of mortality during hospitalization in sick severely malnourished children using daily evaluation of key clinical warning signs
Source: Springer Nature journal article supplement (doi:10.1186/s12916-021-02074-6), 2021-09-20
Supplement: MOESM3 [file 19679342]

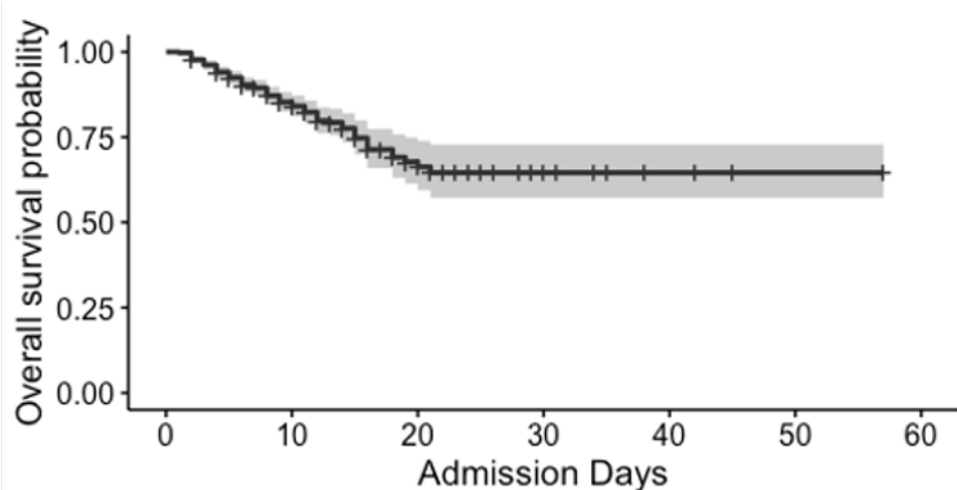

Number at risk

|     |     |    |    |   |   |   |
|-----|-----|----|----|---|---|---|
| 780 | 286 | 46 | 12 | 3 | 1 | 0 |
|-----|-----|----|----|---|---|---|

Cumulative number of events

|   |    |     |     |     |     |     |
|---|----|-----|-----|-----|-----|-----|
| 0 | 99 | 126 | 127 | 127 | 127 | 127 |
|---|----|-----|-----|-----|-----|-----|

Cumulative number of censoring

|   |     |     |     |     |     |     |
|---|-----|-----|-----|-----|-----|-----|
| 0 | 443 | 616 | 642 | 650 | 652 | 653 |
|---|-----|-----|-----|-----|-----|-----|

Admission Days
