# Supplementary material for: Predicting the risk of mortality during hospitalization in sick severely malnourished children using daily evaluation of key clinical warning signs
Source: Springer Nature journal article supplement (doi:10.1186/s12916-021-02074-6), 2021-09-20

**Model-based CWS score**

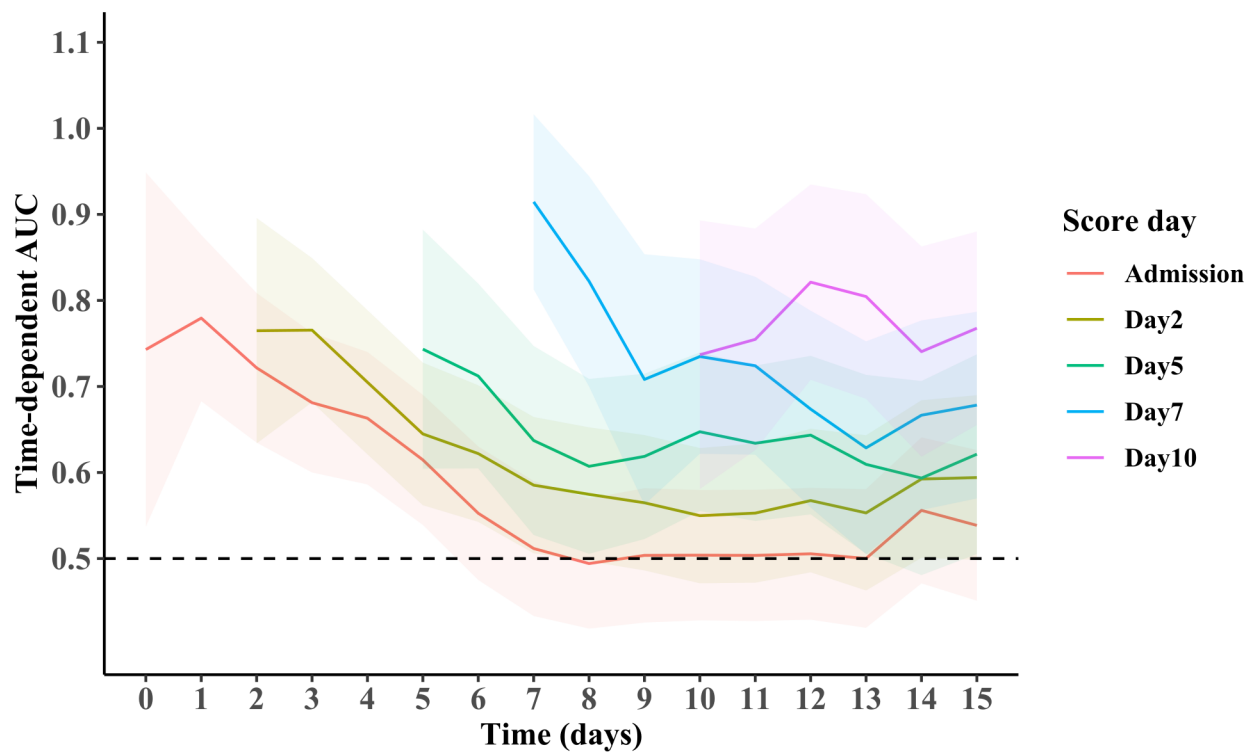

Supplement: MOESM7 [file 19679342]
